# Supplementary material
Source: PubMed Central journal article supplement (PMC2669363)
Supplement: 0808160106_0808160106SI.pdf [file 0808160106_0808160106SI.pdf]

# Supporting Information

Gunz et al. 10.1073/pnas.0808160106

## SI Text

**Details on the Classification of Specimens.** Although a recent direct accelerator mass spectrometry (AMS) radiocarbon dating result of  $\approx 24$  kya is available for Brno 2 (1), Brno 3 was not used because of its uncertain age [the specimen was destroyed in a fire (2)]. With regard to their age, questionable specimens of the UP AMH group are Fish Hoek and Mladeč 5 and 6. The Fish Hoek material was excavated at Peers Cave in the 1920s and assumed to be Middle Stone Age (3). In 1967 a date of  $\approx 36$  kya was published for a supposedly overlying layer (refs. 4 and 5, cited in ref. 6), but relating this layer to the location where the skeleton had been discovered was problematic. Another date of 18.5 kya seemed equally plausible (7). Minichello (8), however, reports a new dating performed “directly on the Fish Hoek Man” that suggests an age of 4.8 kya, but since this result has never been published by R. Singer, we refer to this specimen in our study as “Upper Paleolithic.”

Recently, the Mladeč specimens 1, 2, 8, 9, and 25c were directly dated (9, 10), but the absolute age of the hominids Mladeč 5 and 6 remains unknown, because they do not derive from the Main Cave but from the close-by Quarry Cave (Side Cave). Nevertheless, archaeological evidence supports an Upper Paleolithic origin and in literature they are usually discussed in that context (refs. 11–17 and others).

We placed Jebel Irhoud 1 and 2, Ngaloba, Omo 2, Qafzeh 6, Qafzeh 9, and Skhül 5 in “early AMH.” Following the extensive

literature on these specimens (12, 18–23) it is impossible to distillate a general consensus about their actual classification. However, we defined the following three statements as the least common denominator for our early AMH group: (i) none of these specimens is a Neanderthal; (ii) all of them are close to anatomical modernity or are definitely anatomically modern, although most of them retain as well some archaic features to a different extent; and (iii) all of them are chronologically clearly distinct from the Upper Paleolithic group.

In the archaic *Homo* group we included two specimens, Ngandong 7 and 14, that are both rather controversial in terms of dating and species assignment. Initially the Solo/Ngandong were described as having affinities to Neanderthals (24). Subsequently, however, the discussion emphasized the morphological similarities with archaic *Homo* and *Homo erectus*, respectively. The published dating results from faunal remains vary from  $\approx 27$  to  $\approx 101$  kya (25, 26), but the hominids have never been directly dated and association of the faunal elements is still disputed (27). Despite their potential Upper Paleolithic age, we place Ngandong 7 and 14 in the archaic *Homo* group following the opinion of the majority of authors (24, 26, 28–32) (contra, refs. 27 and 33) who either consider them as being evolved forms of *H. erectus* or early archaic forms of *Homo sapiens*.

Finally, we include the Paderborn specimen in the recent AMH group (see subfossil sample Table 1), as the presumptive age of  $\approx 27$  kya was recently disproved by a direct AMS dating of the specimen that resulted in an age of  $\approx 238$  years (34, 35).

- Pettitt PB, Trinkaus E (2000) Direct radiocarbon dating of the Brno 2 Gravettian human remains. *Anthropologie (Brno)* 38(2):149–150.
- Vlček E (1971) Czechoslovakia. *Catalogue of Fossil Hominids*, Trustees of the British Museum (Natural History), eds Oakley KP, Campell BG, Molleson TI [The British Museum (Natural History), London], Vol Part II: Europe.
- d’Errico F, Henshilwood CS (2007) Additional evidence for bone technology in the southern African Middle Stone Age. *J Hum Evol* 52(2):142–163.
- Anthony BW (1967) Excavations at Peers Cave, Fish Hoek, South Africa. *Palaeoecol Afr* 2:58–59.
- Berger R, Libby WF (1968) UCLA radiocarbon dates VII. *Radiocarbon* 10:149–160.
- Klein RG (1974) Environment and subsistence of prehistoric man in the southern Cape Province, South Africa. *World Archaeol* 5(3):249–284.
- Rightmire GP (1975) Problems in the Study of Later Pleistocene Man in Africa. *Am Anthropol* 77(1):28–52.
- Minichello TJ (2005) Middle Stone Age Lithic Study, South Africa: An examination of modern human origins. PhD thesis (University of Washington, Seattle, WA).
- Wild EM, et al. (2005) Direct dating of early upper palaeolithic human remains from Mladeč? *Nature* 435(7040):332–335.
- Wild EM, Teschler-Nicola M, Kutschera W, Steier P, Wanek W (2006) 14C dating of early Upper Palaeolithic human and faunal remains from Mladeč. *Early Modern Humans at the Moravian Gate: The Mladeč Caves and Their Remains*, ed Teschler-Nicola M (Springer, Vienna), pp 149–158.
- Braeuer G, Broeg H, Stringer CB (2006) Earliest Upper Paleolithic crania from Mladeč, Czech Republic, and the question of Neanderthal-modern continuity: Metrical evidence from the fronto-facial region. *Neanderthals Revisited: New Approaches and Perspectives*, The Max-Planck-Institute Subseries in Human Evolution, eds Harvati K, Harrison T (Springer, Dordrecht, The Netherlands), pp 269–279.
- Braeuer G, Collard M, Stringer C (2004) On the reliability of recent tests of the out of Africa hypothesis for modern human origins. *Anat Rec Part A Discov Mol Cell Evol Biol* 279(2):701–707.
- Frayer DW, Jelinek J, Oliva M, Wolpoff MH (2006) Aurignacian male crania, jaws and teeth from the Mladeč Caves, Moravia, Czech Republic. *Early Modern Humans at the Moravian Gate—The Mladeč Caves and Their Remains*, ed Teschler-Nicola M (Springer, Vienna), pp 185–272.
- Svoboda J (2001) Mladeč and other caves in the Middle Danube region: Early modern humans, late Neanderthals, and projectiles. *Les premiers hommes modernes de la Péninsule Ibérique*, eds Zilhão J, Aubry T, Carvalho AF (Actes du Colloque de la Commission VIII de l’UISPP 17:45–60).
- Szombathy J (1925) Die diluvialen Menschenreste aus der Fürst-Johanns-Höhle bei Lautsch in Mähren. *Die Eiszeit* 2(1):1–34, 73–95.
- Wolpoff MH, Frayer DW, Jelinek J (2006) Aurignacian female crania and teeth from the Mladeč Caves, Moravia, Czech Republic. *Early Modern Humans at the Moravian Gate—The Mladeč Caves and Their Remains*, ed Teschler-Nicola M (Springer, Vienna), pp 273–340.
- Wolpoff MH, Hawks J, Frayer DW, Hunley K (2001) Modern human ancestry at the peripheries: A test of the replacement theory. *Science* 291(5502):293–297.
- Braeuer G, Leakey RE (1986) A new archaic *Homo sapiens* cranium from Eliye Springs, West Turkana, Kenya. *Z Morphol Anthropol* 76(3):245–252.
- Day MH, Stringer CB (1982) A reconsideration of the Omo Kibish remains and the erectus-sapiens transition. *L’Homme erectus et la place de l’homme de Tautavel parmi les hominides fossiles*, ed de Lumley H (Louis Jean Scientific and Literary Publications, Nice, France), Vol 2, pp 814–846.
- Day MH, Stringer CB (1991) Les restes craniens d’Omo-Kibish et leur classification à l’intérieur de genre *Homo*. *L’Anthropologie* 95:573–594.
- McDougall I, Brown FH, Fleagle JG (2005) Stratigraphic placement and age of modern humans from Kibish, Ethiopia. *Nature* 433(7027):733–736.
- Trinkaus E (2005) *Early modern humans*. *Annual Review of Anthropology* 34, pp 207–230.
- White TD, et al. (2003) Pleistocene *Homo sapiens* from Middle Awash, Ethiopia. *Nature* 423(6941):742–747.
- Santa Luca AP (1978) A re-examination of presumed Neanderthal-like fossils. *J Hum Evol* 7(7):619–636.
- Bartstra G-J, Soegondho S, Wijk Avd (1988) Ngandong man: age and artifacts. *Journal of Human Evolution* 17(3):325–337.
- Swisher III CC, et al. (1996) Latest *Homo erectus* of Java: Potential contemporaneity with *Homo sapiens* in Southeast Asia. *Science* 274(5294):1870–1874.
- Grün R, et al. (1997) Dating the Ngandong humans. *Science* 276(5318):1575–1576.
- Anton SC (2002) Evolutionary significance of cranial variation in Asian *Homo erectus*. *Am J Phys Anthropol* 118(4):301–323.
- Bilsborough A (2000) Chronology, variability and evolution in *Homo erectus*. *Variabil Evol* 8:5–30.
- Rightmire GP (1998) Evidence from facial morphology for similarity of Asian and African representatives of *Homo erectus*. *Am J Phys Anthropol* 106(1):61–85.
- Santa Luca AP (1980) The Ngandong fossil hominids: A comparative study of a far eastern *Homo erectus* group (Yale University, New Haven, CT), Yale University Publications in Anthropology, p 175.
- Wood BA (2000) The history of the genus *Homo*. *Hum Evol* 15(1–2):39–49.
- Hawks J, et al. (2000) An Australasian test of the recent African origin theory using the WLH-50 calvarium. *J Hum Evol* 39(1):1–22.
- Street M, Terberger T (2002) German Pleistocene human remains series. *Archaeometry* 44:11–16.
- Street M, Terberger T, Orschiedt J (2006) A critical review of the German Paleolithic hominin record. *J Hum Evol* 51(6):551–579.

36. Mitteroecker P, Gunz P, Bernhard M, Schaefer K, Bookstein FL (2004) Comparison of cranial ontogenetic trajectories among great apes and humans. *J Hum Evol* 46(6):679–697.
37. Harvati K, Weaver TD (2006) Human cranial anatomy and the differential preservation of population history and climate signatures. *Anat Rec A Discov Mol Cell Evol Biol* 288(12):1225–1233.
38. Terhune CE, Kimbel WH, Lockwood CA (2007) Variation and diversity in *Homo erectus*: a 3D geometric morphometric analysis of the temporal bone. *J Hum Evol* 53(1):41–60.
39. Von Cramon-Taubadel N, Lycett SJ (2008) Brief communication: Human cranial variation fits iterative founder effect model with African origin. *Am J Phys Anthropol* 136(1):108–113.

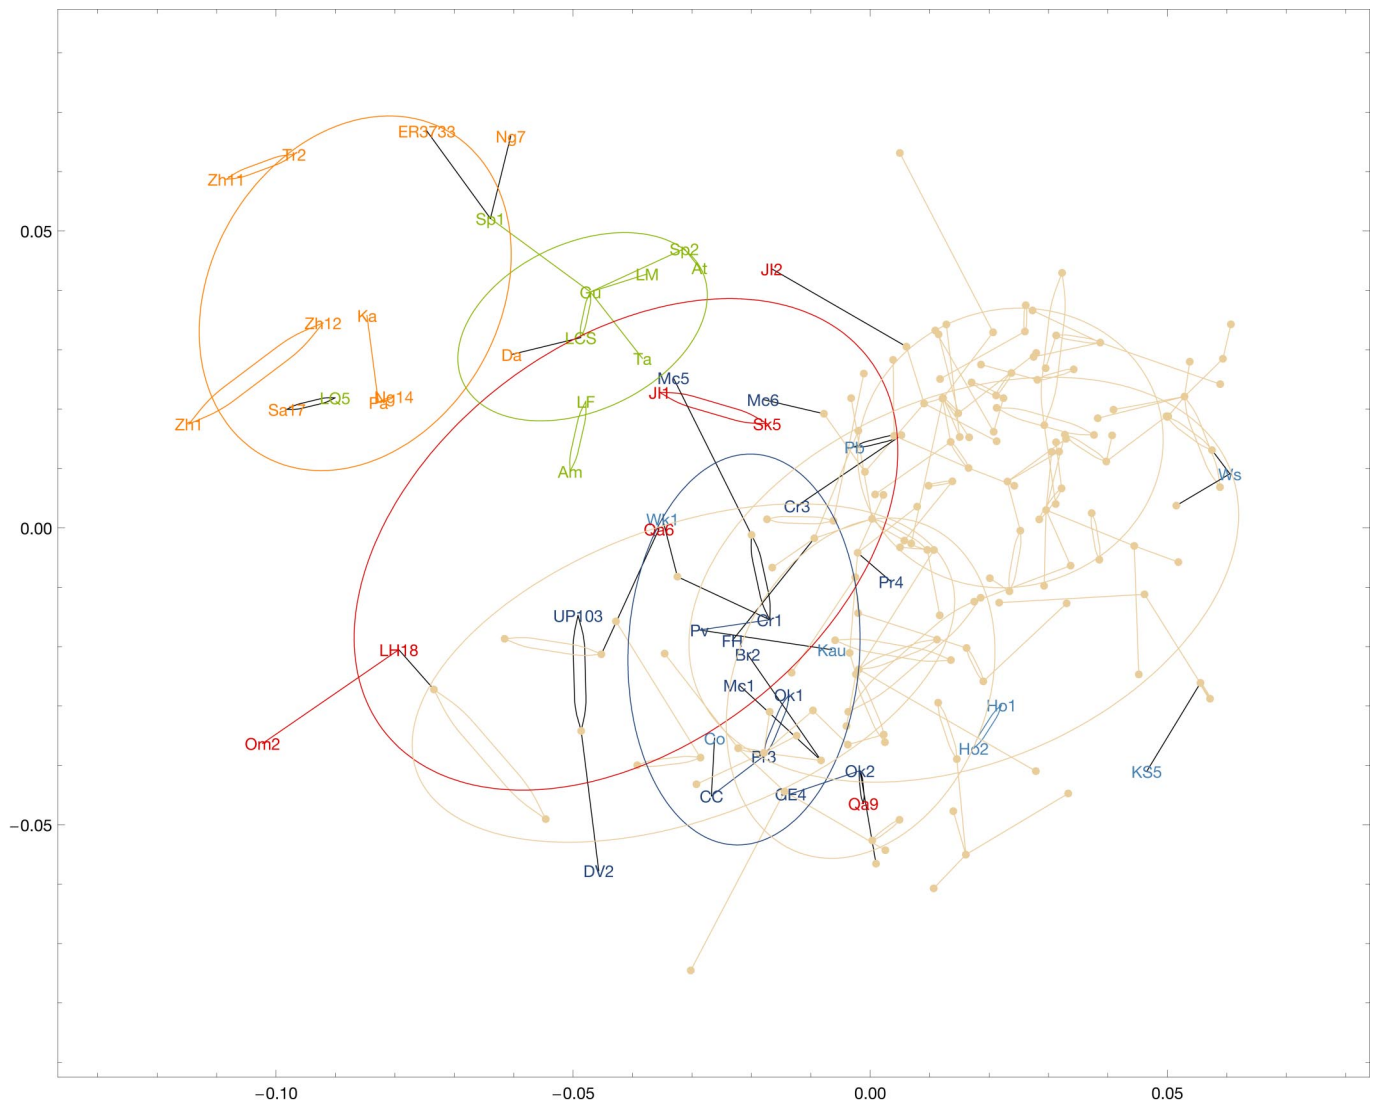

**Fig. S1.** 2D PC plot and nearest neighbor connections. (a) Shape space PC1 vs. PC2. Similar to Fig. 1 in the main text but focuses just on the first two PCs. All specimens except recent humans are labeled according to the abbreviations introduced in Table 1. Recent humans in light brown; UP fossils in blue; early AMH in red, Neanderthals in green, archaic *Homo* in orange. The graph is based on the first two principal components (PCs, 64% of total variation), and includes nearest neighborhood connections according to full Procrustes shape distance. Connections between nearest neighbors from the same group are shown in their group color, connections between nearest neighbors from different groups are drawn as black lines. Equal frequency ellipses (75%) are plotted in group color for all groups. Ellipsoids for recent humans are based on their geographic origin: Africa, Asia, Australia, and Europe. (b) Connected specimens. Nearest neighbor connections (the links in a) in Procrustes space are shown here as a graph. Note that the clusters roughly correspond to group affiliation and geographical origin. Labels for fossils correspond to abbreviations given in Table 1. Recent humans are labeled according to geographical origin with Africa, Asia, Australia, and Europe, except PNG (Papua New Guinea) and Pol (Polynesia). Connections between nearest neighbors from the same group are shown in their group color; connections between nearest neighbors from different groups are drawn as black dashed lines

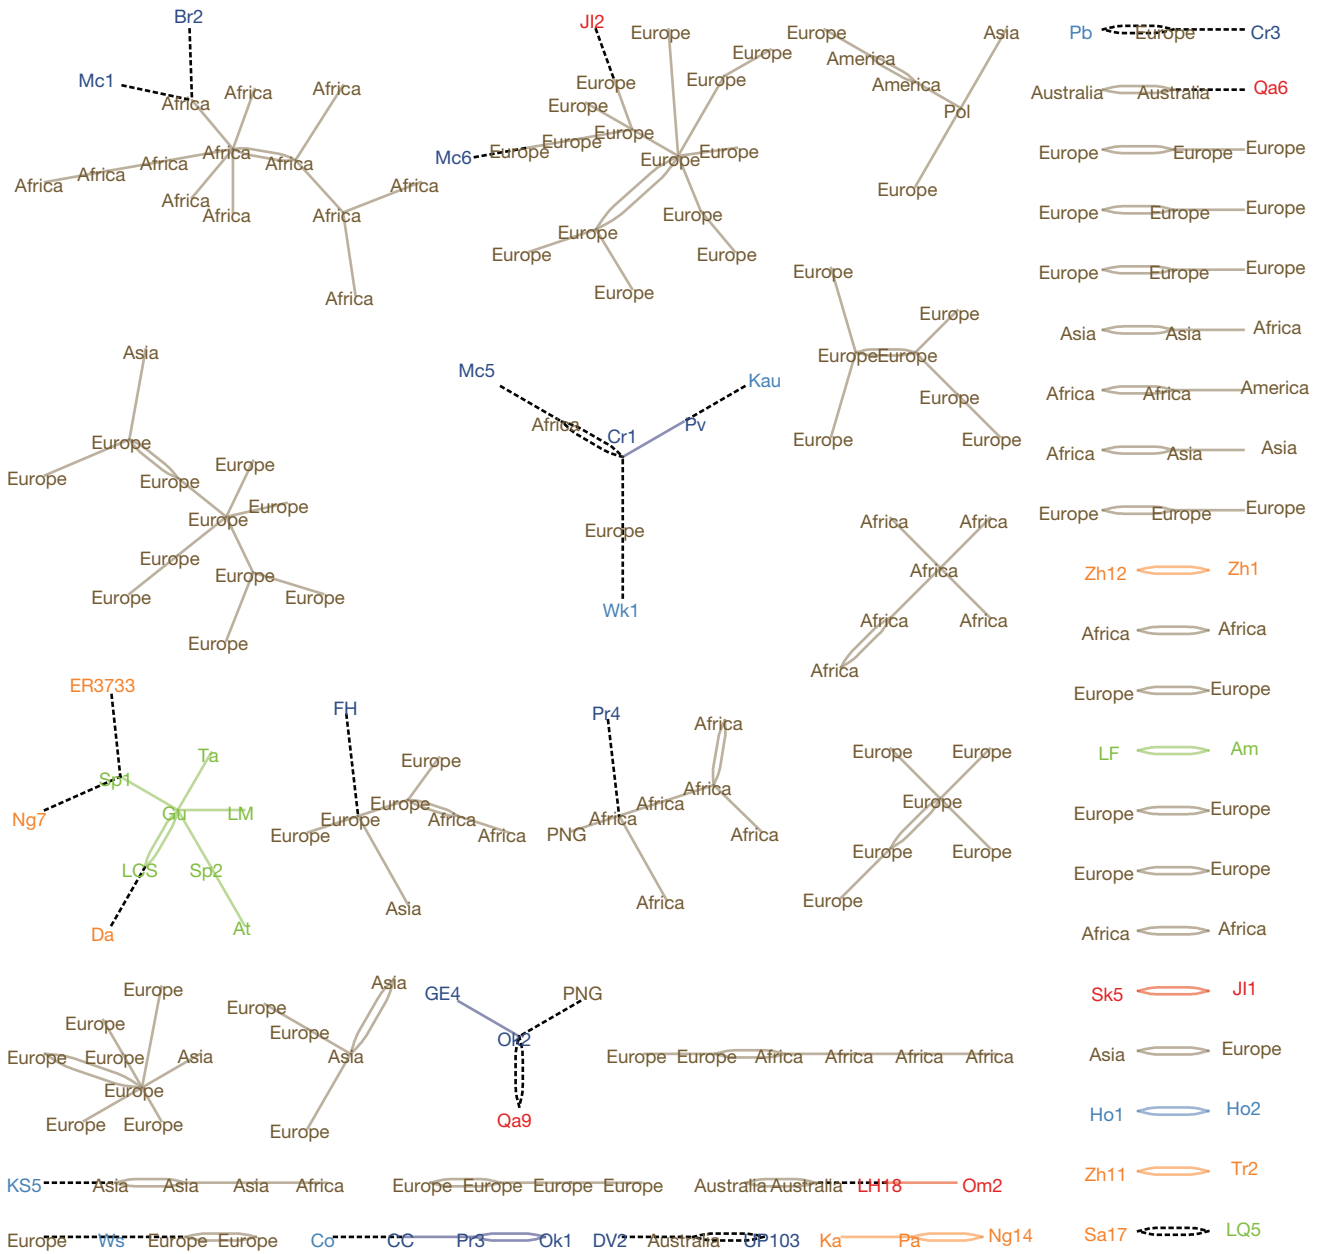

Fig. S1 continued.

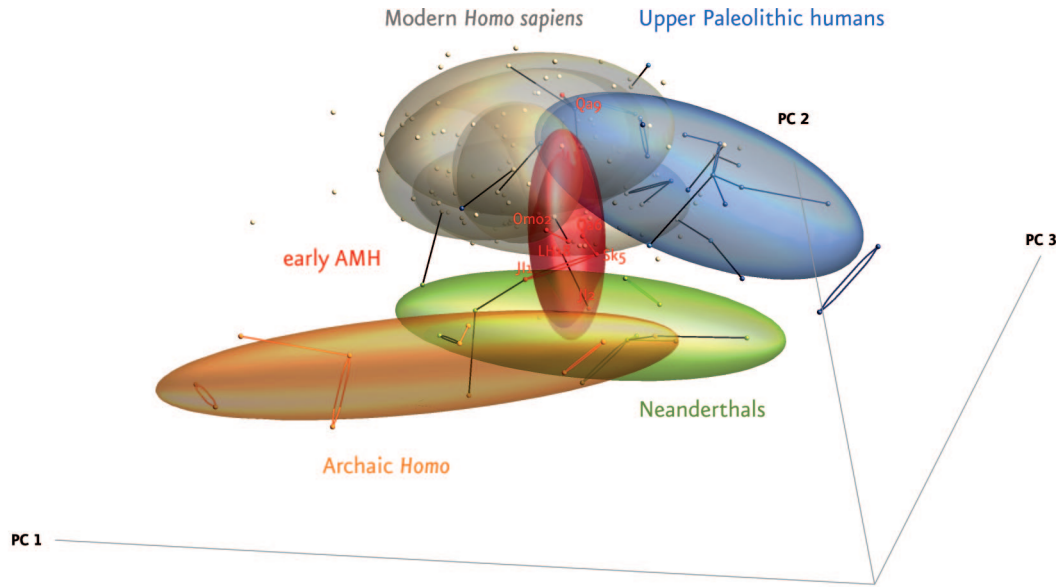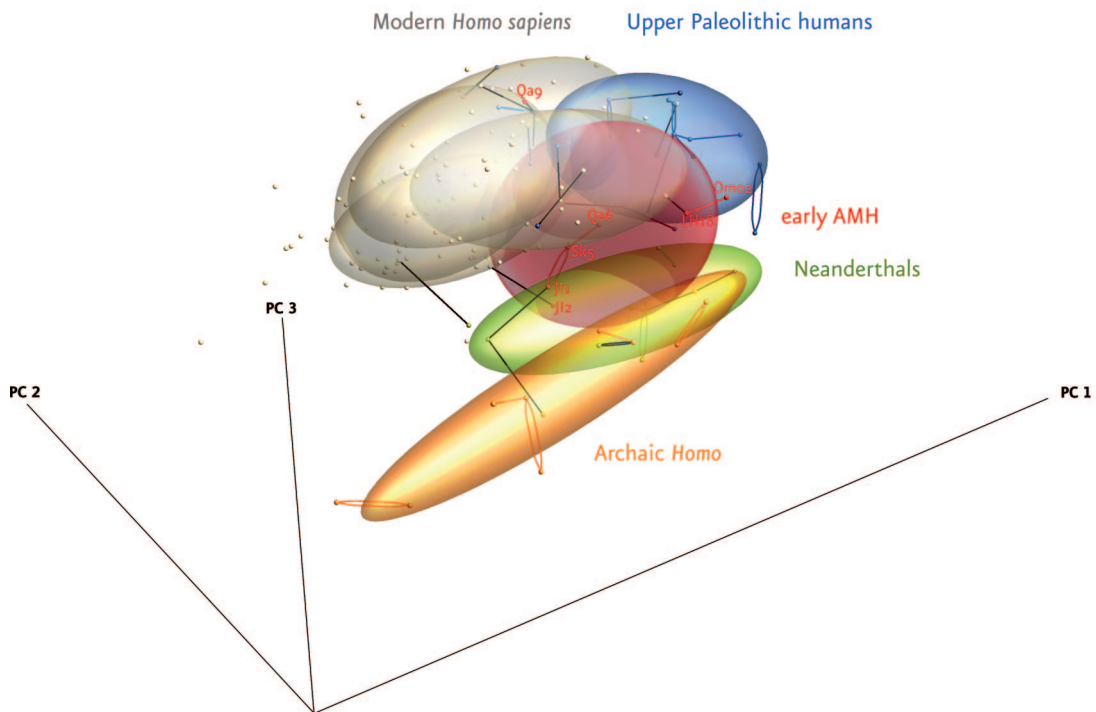

**Fig. S2.** Form-space. Two projections of the first three principal components of Procrustes form-space (“size-shape space”; cf. ref. 36). Recent humans in light brown; UP fossils in blue, early AMH in red, Neanderthals in green, archaic *Homo* in orange. Equal frequency ellipsoids (75%) are plotted in group color. The first PC axis is closely aligned with the overall allometry axis and thus largely reflects differences in log centroid size. Note the considerable size variability among crania of archaic *Homo*. Note also that the separation between AMH and AFH remains when size is part of the analysis. However, a few of the nearest neighbor relationships change in form space. Because size was shown to be associated with climatic variables (37, 38), an analysis in form space is more prone to effects of nonneutral patterns of evolution than it is in shape space. We therefore put more weight on results in shape space to track population history (cf. 39).

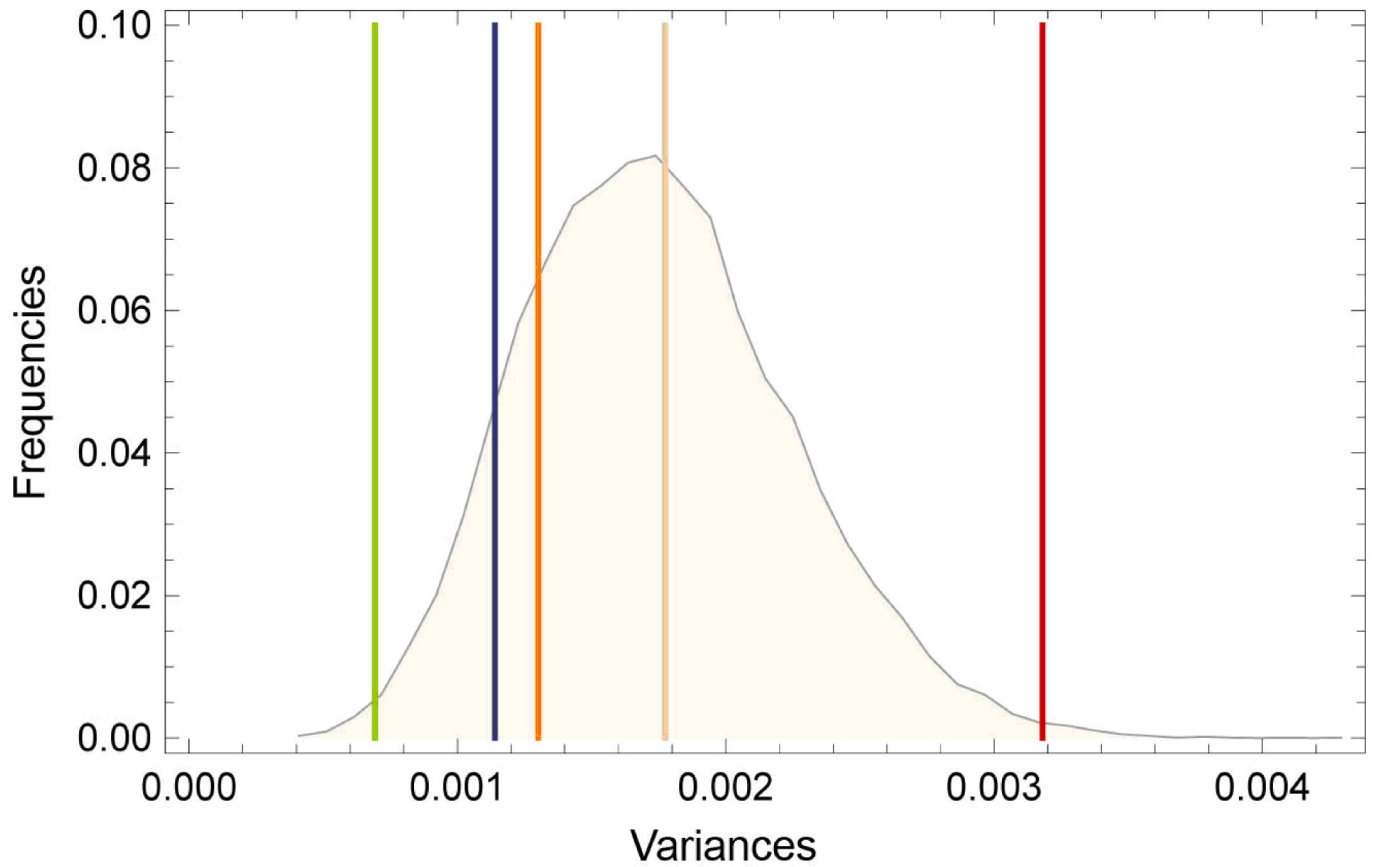

**Fig. S3.** Variances of small subsamples of modern humans. The graph shows the result of a slightly different test for variability as Fig. 2 of the main text. To check if the high variability of the early AMH and the low variability of the Neanderthals could be a sampling artifact due to the small sample sizes, we randomly picked 10 modern humans and computed the total variance from these small subsamples. Shown here are the group variances in shape space (recent humans in light brown, UP fossils in blue, early AMH in red, Neanderthals in green, archaic *Homo* in orange.) and the distribution of variances (gray curve) obtained from 10,000 small modern human subsamples.



**Table S1. Landmarks in the study**

| No. | Landmarks                    | Abbreviation |
|-----|------------------------------|--------------|
| 1   | Nasion                       | N            |
| 2   | Glabella                     | G            |
| 3   | Bregma                       | B            |
| 4   | Inion                        | I            |
| 5   | Auriculare left              | AUL          |
| 6   | Auriculare right             | AUR          |
| 7   | Mastoidale left              | MSL          |
| 8   | Mastoidale right             | MSR          |
| 9   | Stephanion left              | STL          |
| 10  | Stephanion right             | STR          |
| 11  | Frontomalare temporale left  | FMTL         |
| 12  | Frontomalare temporale right | FMTR         |
| 13  | Frontomalare orbitale left   | FMOL         |
| 14  | Frontomalare orbitale right  | FMOR         |
| 15  | Frontotemporale left         | FTL          |
| 16  | Frontotemporale right        | FTR          |
